# Supplementary material for: Serum salusin levels in diarrhea- and constipation-predominant irritable bowel syndrome
Source: PeerJ journal article supplement (doi:10.7717/peerj.18859), 2025-01-30
Supplement: Data.xlsx [file Data.xlsx]

## Sheet: Sayfa1
		control	Salusin alfa		Salusin beta	constipation	Salusin alfa		Salusin beta	diarrhea	Salusin alfa		Salusin beta
		1	355		185	1	274		364	1	752		382
		2	168		259	2	357		868	2	234		306
		3	159		272	3	257		472	3	271		362
		4	372		382	4	551		415	4	292		469
		5	150		160	5	244		450	5	288		714
		6	316		345	6	345		463	6	340		268
		7	329		367	7	516		417	7	513		415
		8	416		520	8	307		441	8	110		470
		9	277		487	9	220		410	9	115		218
		10	132		289	10	243		464	10	252		393
		11	319		381	11	150		322	11	110		330
		12	402		335	12	334		163	12	116		348
		13	212		365	13	188		500	13	247		290
		14	385		142	14	251		369	14	234		312
		15	267		356	15	596		363	15	115		423
		16	943		691	16	268		160	16	115		420
		17	800		850	17	209		503	17	108		220
		18	191		375	18	150		417	18	250		397
		19	199		347	19	260		574	19	449		375
		20	283		500	20	254		425	20	521		445
		21	536		840	21	490		261	21	154		345
		22	150		160	22	244		350	22	270		199
		23	363		160	23	150		160	23	113		351
		24	371		686	24	240		436	24	125		414
		25	363		488	25	460		367	25	147		721
		26	371		500	26	420		107	26	179		430
		27	363		587	27	333		262	27	226		500
		28	412		449	28	301		347	28	500		423
						29	191		500	29	326		355
						30	444		415	30	251		441
			343		409.929		308.233		387.5		255.214		390.714
			Salusin alfa	Salusin beta
		Control	343	409.929
		Constipation	308.233	387.5
		Diarrhea	255.214	390.714
