# Supplementary material for: Serum salusin levels in diarrhea- and constipation-predominant irritable bowel syndrome
Source: PeerJ journal article supplement (doi:10.7717/peerj.18859), 2025-01-30
Supplement: STROBE.doc [file STROBE.doc]

STROBE Statement—Checklist of items that should be included in reports of ***case-control studies***

|  | Item No | Recommendation | Page/Line |
| --- | --- | --- | --- |
| **Title and abstract** | 1 | (*a*) Indicate the study’s design with a commonly used term in the title or the abstract  - Serum Salusin Levels in Irritable Bowel Syndrome | 1-2/1-3 |
| (*b*) Provide in the abstract an informative and balanced summary of what was done and what was found  -These information are stated in the study abstract (study objective described, method and results described). The aim of this study was to analyze the importance of the levels of salusin in the blood, an inflammation-related parameter, in the diagnosis and prediction of irritable bowel disease. | 2/14-25 |
| Introduction | | |  |
| Background/rationale | 2 | Explain the scientific background and rationale for the investigation being reported  -In this study, we aimed to evaluate the prognostic significance of serum salusin levels in irritable bowel syndrome. Rationale and existing literature are stated in the introduction section. | 2/25-45 |
| Objectives | 3 | State specific objectives, including any prespecified hypotheses  A statement at the end of the introduction specifies the specific goals and objectives.  - Irritable bowel syndrome has a multifactorial cause and requires long-term follow-up. These patients use multiple medications. Therefore, prognostic markers are needed. Salusin levels in subgroups of irritable bowel syndrome may be diagnostically and prognostically significant. This is important as it is the first study in the literature. We observed that the role of salusins ​​in irritable bowel syndrome (IBS) has never been studied before. The data obtained as a result of our research will shed light on the pathogenesis of the disease. Thus, it will provide information for early diagnosis and the development of new treatment agents. | 2-3/45-51 |
| Methods | | |  |
| Study design | 4 | Present key elements of study design early in the paper  -Study design is stated in the first subsection of Methods. Key elements are all described in the methods  -The Ethics Committee for Health Sciences of the Medical Faculty of Celal Bayar University has approved the ethical approval, on April 24, 2024, with decision number 20.478.486/2386. | 3/25 |
| Setting | 5 | Describe the setting, locations, and relevant dates, including periods of recruitment, exposure, follow-up, and data collection  Setting, locations, and relevant dates, including periods of recruitment, exposure, follow-up, and data collection are described in the methods and material sections Page 3 | 3/50-60 |
| Participants | 6 | (*a*) Give the eligibility criteria, and the sources and methods of case ascertainment and control selection. Give the rationale for the choice of cases and controls  - Study population is described is the method section Page 3  Our study was planned to have 30±2 patients in each group.  Group 1: Diarrhea-predominant IBS (n=30±2)  Group 2: Constipation-predominant IBS (n=30±2)  Group 3: Healthy (control) group (n=30±2)  Pregnant women, those with a history of malignancy, those with a history of other chronic diseases, those using additional medications, and those with a history of gastrointestinal surgery were not included in the study. | 3/50-55 |
| (*b*)For matched studies, give matching criteria and the number of controls per case | 3/55-58 |
| Variables | 7 | Clearly define all outcomes, exposures, predictors, potential confounders, and effect modifiers. Give diagnostic criteria, if applicable  - Standardized variable definitions were used across all programs, which are presented in method section. Page 3  -Irritable bowel syndrome was diagnosed according to Rome-4 criteria.  -Blood samples taken from patients during routine outpatient clinic check-ups will be used. Therefore, our study does not have a potential risk for the patient.  -There are risks such as loss of time in explaining research consent to patients and loss of samples before reaching the laboratory | 3/55-60 |
| Data sources/ measurement | 8* | For each variable of interest, give sources of data and details of methods of assessment (measurement). Describe comparability of assessment methods if there is more than one group  - Data collection and measurement was the same for all variables, and is described in the methods section. Page 3  -A biochemical tube (5 ml) of venous blood sample was taken from the patient and control groups. Blood Sample Collection were accumulated from patients and controls between 9am and 10am. Baseline blood sample collection were drawn in vacuum containers with Na2-EDTA (1.5 mg/ml) and Centrifuge 10 minutes at 3,000 RPM, the supernatant was stored frozen at -80°C until it was examined by an expert. CBC, blood glucose values and blood lipid values for all participants were obtained from hospital recordsEnzyme immunoassay (ELISA) method has been used for the measurement of salusin levels. Sample and standard optical densities were read at 450 nm on a Spectramax ELISA analyzer (Molecular Instruments). Results were presented in pg/ml. | 3/60-65 |
| Bias | 9 | Describe any efforts to address potential sources of bias  - We notably tried to reduce bias by excluding suspect cases. The analysis section also explains part of our analysis was adjusted on type on context in order to reduce bias Page 3 | Not applicable |
| Study size | 10 | Explain how the study size was arrived at  - Our study was planned to have 30±2 patients in each group.  Group 1: Diarrhea-predominant IBS (n=30±2)  Group 2: Constipation-predominant IBS (n=30±2)  Group 3: Healthy (control) group (n=30±2) | 3/50-54 |
| Quantitative variables | 11 | Explain how quantitative variables were handled in the analyses. If applicable, describe which groupings were chosen and why  - Continuous values have been expressed as the mean value± SD and median value (minimum–maximum), while categorical variables and values were reported as numbers (percentages). One-way ANOVA was used to compare normally-distributed data. Kruskal-wallis test was used for data which were non-normally distributed. Statistically significant results were defined as a p-value < 0.05. | 3/65-75 |
| Statistical methods | 12 | (*a*) Describe all statistical methods, including those used to control for confounding  These are described in the method section Page 3  - Continuous values have been expressed as the mean value± SD and median value (minimum–maximum), while categorical variables and values were reported as numbers (percentages). One-way ANOVA was used to compare normally-distributed data. Kruskal-wallis test was used for data which were non-normally distributed. Statistically significant results were defined as a p-value < 0.05. | 3/70-75 |
| (*b*) Describe any methods used to examine subgroups and interactions | 3/70-74 |
| (*c*) Explain how missing data were addressed | Not applicable |
| (*d*) If applicable, explain how matching of cases and controls was addressed | Not applicable |
| (*e*) Describe any sensitivity analyses | Not applicable |
| Results | | |  |
| Participants | 13* | (a) Report numbers of individuals at each stage of study—eg numbers potentially eligible, examined for eligibility, confirmed eligible, included in the study, completing follow-up, and analysed | 4/79-82 |
| (b) Give reasons for non-participation at each stage | Not applicable |
| (c) Consider use of a flow diagram | Not applicable |
| Descriptive data | 14* | (a) Give characteristics of study participants (eg demographic, clinical, social) and information on exposures and potential confounders  - Table 1 describes the participants | 4-5/80-83 |
| (b) Indicate number of participants with missing data for each variable of interest | Not applicable |
| Outcome data | 15* | Report numbers in each exposure category, or summary measures of exposure | Not applicable |
| Main results | 16 | (*a*) Give unadjusted estimates and, if applicable, confounder-adjusted estimates and their precision (eg, 95% confidence interval). Make clear which confounders were adjusted for and why they were included  -There were 50 (58.8%) women and 35 (41.2%) men. Among the women, 23.5% had C IBS, 16.5% had D IBS and 18.8% were control group. Of the male participants, 9.4% had C-IBS, 17.6% had D-IBS, and 14.1% were controls. The mean age of the participants was 54.29 ± 14.76 years. There were no major differences in age, gender type, White Blood Cells [WBCs] count, C-Reactive Protein [CRP] or hemoglobin levels of IBS and control groups. Salusin-αlfa levels were statistically significantly reduced in the D-IBS group (p = 0.026). Salusin levels were not significant difference between C-IBS and D-IBS groups; however, the reduction in salusin-α levels was more pronounced in D-IBS. Salusin-αlfa and salusin-βeta levels were not related. The number of lymphocytes was lower in the D-IBS group (p = 0.047). Demographics and laboratory characteristics are presented in Table 1. The levels of Salusin-αlfa and Salusin-βeta are presented in Figure 1. | 5-6/80-90 |
| (*b*) Report category boundaries when continuous variables were categorized | Not applicable |
| (*c*) If relevant, consider translating estimates of relative risk into absolute risk for a meaningful time period | Not applicable |

| Other analyses | 17 | Report other analyses done—eg analyses of subgroups and interactions, and sensitivity analyses |  | Not applicable |
| --- | --- | --- | --- | --- |
| Discussion | | |  |  |
| Key results | 18 | Summarise key results with reference to study objectives  -The serum levels of salusin-α were substantially reduced in the diarrhea-predominant IBS group versus controls. There was also no major difference in the levels of salusin between the Constipation-predominant-IBS and the Diarrhea-predominant IBS group.  - A major prognostic relationship was found between the level of salusins and the subgroup of D-IBS. It is well known that salusines have been related to inflammatory processes and oxidative injury in previous studies. The relationship between salusin and gastrointestinal diseases should be further investigated. Low-grade submucosal intestinal inflammation is also associated with irritable bowel syndrome. It is our belief that salusins may be useful in diagnosing, predicting or treating IBS. |  | 7/91-93, 9-10/130-135 |
| Limitations | 19 | Discuss limitations of the study, taking into account sources of potential bias or imprecision. Discuss both direction and magnitude of any potential bias  -The limitations of our study are that it included a small number of patients and was conducted in a single center. Accordingly, further and more comprehensive studies in larger patient populations are needed. |  | 7-8/127-131 |
| Interpretation | 20 | Give a cautious overall interpretation of results considering objectives, limitations, multiplicity of analyses, results from similar studies, and other relevant evidence  -References were added where possible, and discussed. Limitations were taken into account. This highlights the importance of the present study as the first of this kind in the literature. |  | 10-11/135-143 |
| Generalisability | 21 | Discuss the generalisability (external validity) of the study results |  | 8-10/130-140 |
| Other information | | |  |  |
| Funding | 22 | Give the source of funding and the role of the funders for the present study and, if applicable, for the original study on which the present article is based |  | Not applicable |

*Give information separately for cases and controls.

**Note:** An Explanation and Elaboration article discusses each checklist item and gives methodological background and published examples of transparent reporting. The STROBE checklist is best used in conjunction with this article (freely available on the Web sites of PLoS Medicine at http://www.plosmedicine.org/, Annals of Internal Medicine at http://www.annals.org/, and Epidemiology at http://www.epidem.com/). Information on the STROBE Initiative is available at http://www.strobe-statement.org.
